# Supplementary material
Source: ML conference proceedings conference paper supplement (https://openaccess.thecvf.com/content/ICCV_2017/html/Neuhold_The_Mapillary_Vistas_ICCV_2017_paper.html)
Supplement: Supplementary file 1 [file Neuhold_The_Mapillary_Vistas_ICCV_2017_supplemental.pdf]

# The Mapillary Vistas Dataset for Semantic Understanding of Street Scenes

## Supplementary Material

Gerhard Neuhold, Tobias Ollmann, Samuel Rota Bulò, Peter Kotschieder  
Mapillary Research  
research@mapillary.com

### Abstract

*We provide the following additional contributions to our ICCV submission:*

- *definition of the main categories in the dataset together with an illustrative image;*
- *detailed results on semantic segmentation and instance-specific semantic segmentation;*
- *the taxonomy of classes.*

### Class-Label Definitions

In the following table we provide a description of the categories in the dataset. Each entry provides the category's name together with its root-level and macro-level groups, the definition of the category including some instructions for the annotator, an illustrative RGB image and the corresponding segmentation. The latter segmentation is shown only for a single object instance, also in the case multiple instances are depicted.

| Root-level | Macro-level | Category | Definition                                    | RGB Image                                                                            | Example                                                                               |
|------------|-------------|----------|-----------------------------------------------|--------------------------------------------------------------------------------------|---------------------------------------------------------------------------------------|
| object     | object      | banner   | Typically a flag, made of textile or plastic. |  |  |
|            |             | bench    | A place to sit down.                          |  |  |

bike rack      A construction to place and lock a bike.

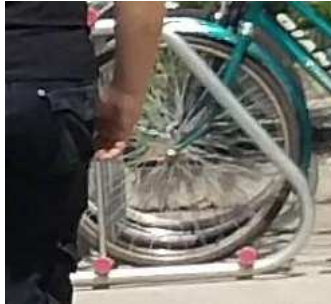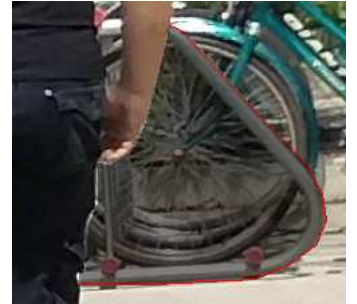

billboard      Advertisements placed in public space and also those mounted on buildings.

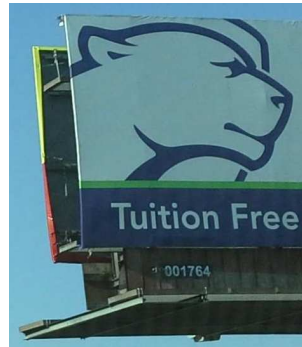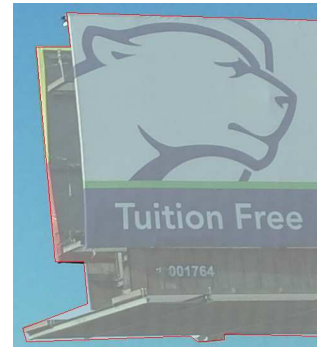

catch-basin      Sewage water drainage, typically with a grid on top or inlet of a curb.

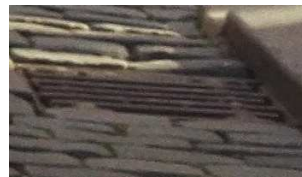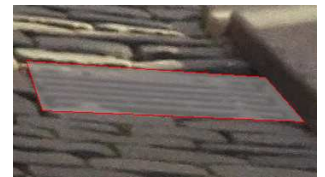

cctv-camera      Surveillance camera mounted in public space.

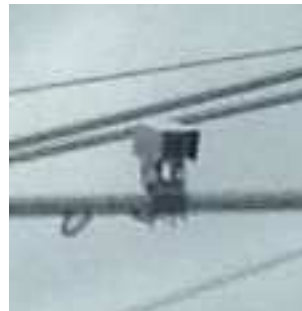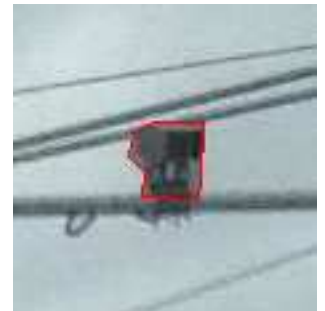

fire-hydrant      Water outlet typically used by fire-fighters.

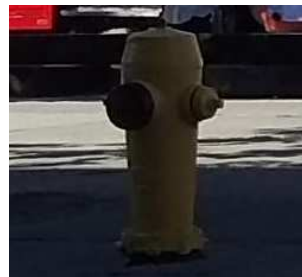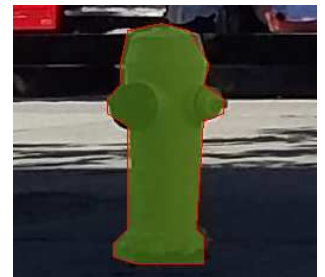

junction-box  
An electrical junction box can contain junctions of electric wires and/or cables.

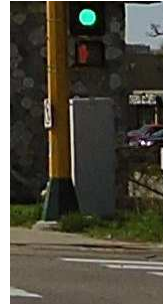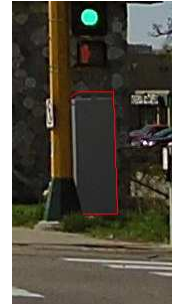

mailbox  
A box to put mail into.

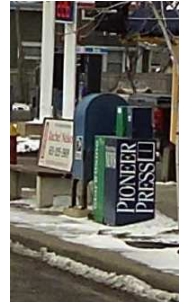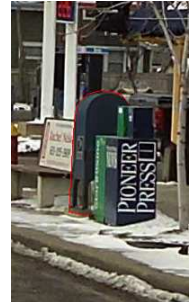

manhole  
Opening in road to access canal system. Has to be big enough to fit a person and includes squared ones.

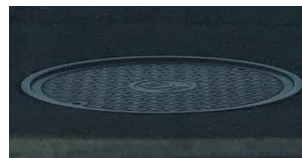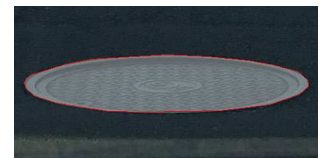

phone booth  
A public call box typically equipped with a payphone.

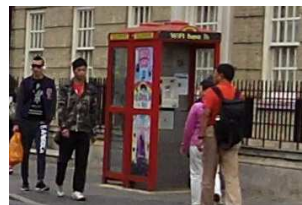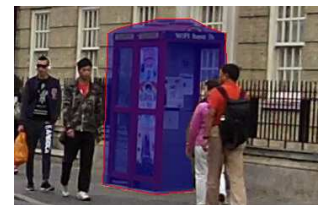

pothole  
A depression or hollow in a road caused by wear or subsidence.

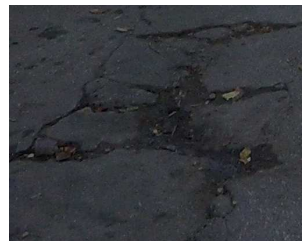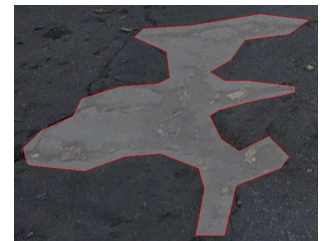

street-light  
Lights mounted on poles to illuminate the road or public places.

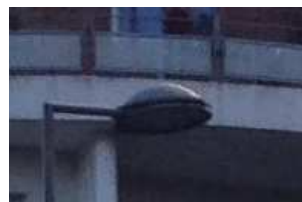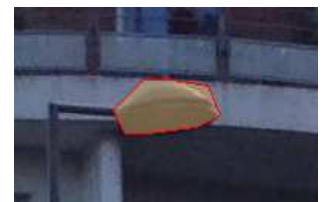

|         |                    |                                                                                                                                                                                                                                                                                                                                                                                                                                                                                                       |                                                                                      |                                                                                       |
|---------|--------------------|-------------------------------------------------------------------------------------------------------------------------------------------------------------------------------------------------------------------------------------------------------------------------------------------------------------------------------------------------------------------------------------------------------------------------------------------------------------------------------------------------------|--------------------------------------------------------------------------------------|---------------------------------------------------------------------------------------|
| support | pole               | Thin and elongated, typically vertically oriented poles, <i>e.g.</i> sign or traffic light poles. Does not include objects mounted on the pole. Poles holding only street lights should also be labeled as pole.                                                                                                                                                                                                                                                                                      |    |    |
|         | traffic-sign-frame | Frame construction holding large signs, where frame can be made of round or square poles. Can be typically found on highways.                                                                                                                                                                                                                                                                                                                                                                         |    |    |
|         | utility-pole       | Utility poles are supposed to carry electrical wires/cables, could be used to mount mobile phone network receivers, and are used in case both, cables <i>and</i> street lights are mounted.                                                                                                                                                                                                                                                                                                           |    |    |
| object  | traffic light      | Traffic lights without poles in different orientations (upright, horizontal, side, back, front) and for all types of traffic participants, <i>e.g.</i> regular traffic light, bus traffic light, train traffic light. If the type can be determined but does not match any of the defined categories ( <i>e.g.</i> traffic lights for trains), then <i>traffic light - other</i> is used. If the orientation or type of traffic light cannot be determined, <i>traffic light - ambiguous</i> is used. |  |  |



|              |           |                                                                                                                                                                                                                                                                                                     |                                                                                      |                                                                                       |
|--------------|-----------|-----------------------------------------------------------------------------------------------------------------------------------------------------------------------------------------------------------------------------------------------------------------------------------------------------|--------------------------------------------------------------------------------------|---------------------------------------------------------------------------------------|
| traffic-sign | front     | Signs with the purpose of conveying information to drivers/cyclists/pedestrians, <i>e.g.</i> traffic signs or warning reflector posts. If the type of a front-viewed traffic sign cannot be determined, <i>e.g.</i> because of unknown language, <i>traffic sign - unknown</i> is used as fallback. |    |    |
|              | back      | Back side of traffic signs.                                                                                                                                                                                                                                                                         |    |    |
| object       | trash-can | Recycling facility for waste collection.                                                                                                                                                                                                                                                            |   |   |
| vehicle      | bicycle   | Includes bicycles without the cyclist or possibly other passengers. The cyclist and passengers receive label cyclist.                                                                                                                                                                               |  |  |
|              | boat      | Vehicle suitable for riding/sailing on water.                                                                                                                                                                                                                                                       |  |  |

bus

Includes buses that are intended for 9+ persons for public or long-distance transport.

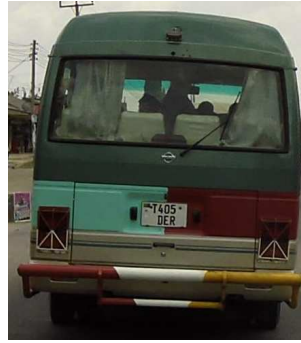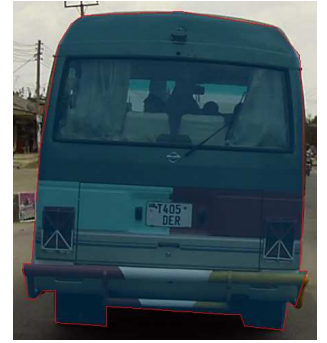

car

This includes cars, jeeps, SUVs, vans with a continuous body shape (*i.e.* the driver cabin and cargo compartment are one).

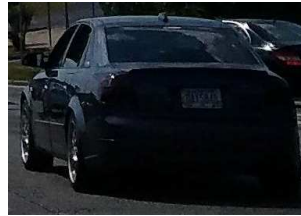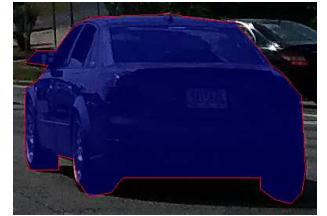

caravan

Vehicles that (appear to) contain living quarters. This also includes trailers that are used for living and has priority over the trailer class.

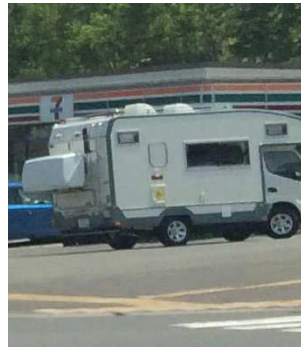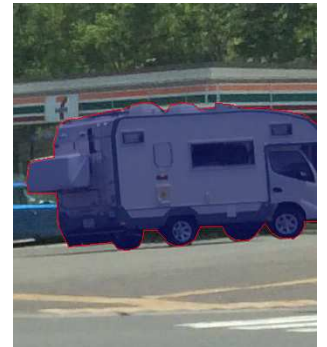

motorcycle

This includes motorcycles, mopeds without the driver or other passengers. Both driver and passengers receive the label motorcyclist.

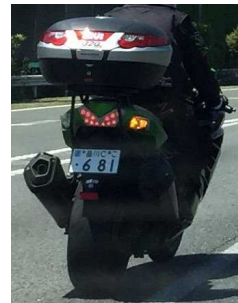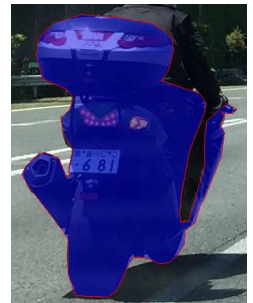

on rails

All vehicles moving on rails, *e.g.* trams, trains.

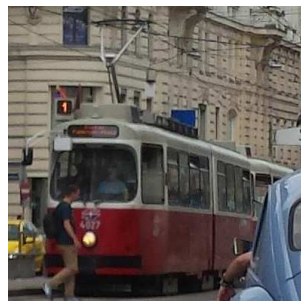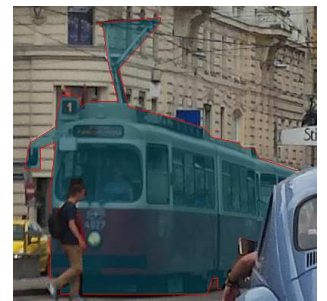

other-vehicle  
Fallback category for vehicles not explicitly defined otherwise in meta category level vehicle.

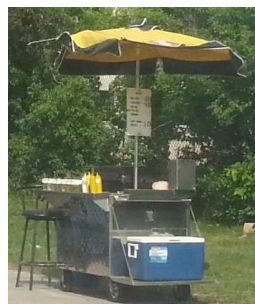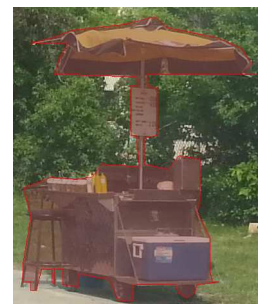

trailer  
Trailers that can be attached to any vehicle, but excludes trailers attached to trucks. The latter belong to class truck.

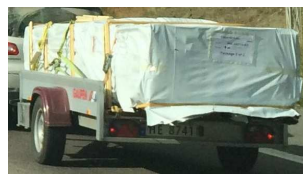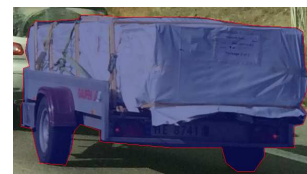

truck  
This includes trucks, vans with a body that is separate from the driver cabin, pickup trucks, as well as their attached trailers.

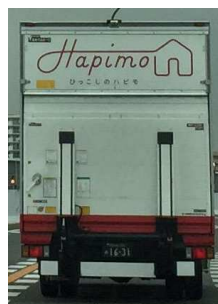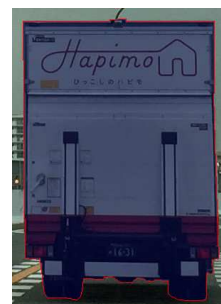

wheeled-slow  
Covers all slow moving wheeled objects like wheelchairs, mobility-scooters, scooters, prams or rickshaw. All of which can potentially have riders (*other rider*) sitting on them, similar to bicycles are driven by cyclists.

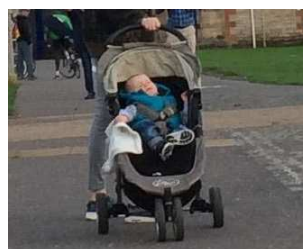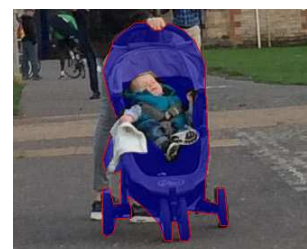

con-  
struction

flat

bike lane

Paved areas intended for bicycle use only. Does not include regions meant to be used by both cyclists and pedestrians. Regions of road intended for mixed cycle and car use are labeled as road. Contains only regions of ground specifically designated for cyclists where pedestrians and cars should not enter, *e.g.* separated by curb or lane markings (dashed or driveable).

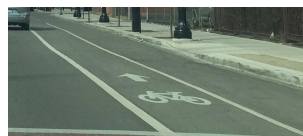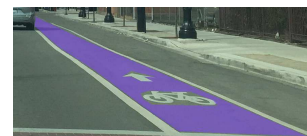

|                    |                                                                                                                                                                                                                                                                                         |                                                                                      |                                                                                       |
|--------------------|-----------------------------------------------------------------------------------------------------------------------------------------------------------------------------------------------------------------------------------------------------------------------------------------|--------------------------------------------------------------------------------------|---------------------------------------------------------------------------------------|
| crosswalk<br>plain | Region of a road which is meant to cross the street but not marked with a zebra pattern, instead two parallel lines indicate the crosswalk. The road surface is marked as plain crosswalk, the two lines indicating the border are marked as general markings.                          |    |    |
| curb cut           | Lowered curbs ( $\approx 3\text{cm}$ ) or curb cuts ( $< 3\text{cm}$ ) which can be driven over, <i>e.g.</i> by wheelchairs.                                                                                                                                                            |    |    |
| parking            | Surfaces that are intended for parking and separated from the road either via elevation or different texture/material or lane markings. Only the area which is available for parking has to be annotated. Flat areas used to get on a specific parking slot need to be labeled as road. |    |    |
| pedestrian<br>area | Areas solely to be used by pedestrians. <i>E.g.</i> in inner city areas or parks, shopping zones, <i>etc.</i>                                                                                                                                                                           |  |  |
| rail track         | Horizontal surface on which rail cars typically drive. If rail-tracks are embedded in a conventional road block, the rail track is drawn on top of a road label.                                                                                                                        |  |  |
| road               | Surface on which cars usually drive on. Typically delimited by curbs, parking areas or bicycle lanes.                                                                                                                                                                                   |  |  |

|         |               |                                                                                                                                                                                                                                                                                                                                 |                                                                                      |                                                                                       |
|---------|---------------|---------------------------------------------------------------------------------------------------------------------------------------------------------------------------------------------------------------------------------------------------------------------------------------------------------------------------------|--------------------------------------------------------------------------------------|---------------------------------------------------------------------------------------|
|         | service lane  | Road shoulders, typically on highways, which offer enough space for a car to drive and stop in emergency cases. Usually on the right side of drivable lanes (viewed in driving direction, in case of right-hand traffic), but can also be on the left side.                                                                     |    |    |
|         | sidewalk      | Horizontal surface designated for pedestrians or cyclists. Delimited from the road by some obstacles, e.g. curbs (raised or lowered) or poles, but not only by marking. Often elevated compared to the road and often located at the side of a road. Also includes walkable parts of traffic islands, but not pedestrian areas. |    |    |
| barrier | curb          | Raised (>3cm) formation typically between road and sidewalk or terrain. Includes the curb's horizontal and vertical surface. If there is no clear border between sidewalk/terrain and curb, only the vertical surface is labeled.                                                                                               |   |   |
|         | fence         | Freestanding structure with holes that separate two (or more) outdoor areas, sometimes temporary ones.                                                                                                                                                                                                                          |  |  |
|         | guard rail    | Metal structure mounted on the side of the road to prevent serious accidents. Includes the bars holding the rails.                                                                                                                                                                                                              |  |  |
|         | other barrier | Fallback category for other forms of barriers, e.g. lane separator, jersey barrier.                                                                                                                                                                                                                                             |  |  |



|           |                 |                                                                                                                                                                                                                         |                                                                                      |                                                                                       |
|-----------|-----------------|-------------------------------------------------------------------------------------------------------------------------------------------------------------------------------------------------------------------------|--------------------------------------------------------------------------------------|---------------------------------------------------------------------------------------|
|           | wall            | Individually standing walls that separate two (or more) outdoor areas, and do not provide support for a building. Includes transparent walls.                                                                           |    |    |
| structure | bridge          | Bridges (on which the ego-vehicle is not driving) including everything (fences, guard rails) permanently attached to them.                                                                                              |    |    |
|           | building        | Includes structures that house/shelter humans, e.g. low-rises, skyscrapers, bus stops, carports. Translucent buildings made of glass still receive the label building. Also includes scaffolding attached to buildings. |    |    |
|           | tunnel          | Tunnel walls and the dark space encased by the tunnel, but excluding vehicles.                                                                                                                                          |  |  |
| marking   | crosswalk zebra | Crosswalk indicated by a zebra pattern.                                                                                                                                                                                 |  |  |
|           | general         | Other lane markings including dashed and solid lane separation markings, stop lines, text, arrows or restricted areas.                                                                                                  |  |  |



|        |              |                                                                                                    |                                                                                      |                                                                                       |
|--------|--------------|----------------------------------------------------------------------------------------------------|--------------------------------------------------------------------------------------|---------------------------------------------------------------------------------------|
| human  | person       | Persons moving by their own legs, sitting or in any unusual pose but not meant to drive a vehicle. |    |    |
| rider  | bicyclist    | Humans driving a bicycle. Does not include the bicycle or persons moving a bike while walking.     |    |    |
|        | motorcyclist | Person riding a motorcycle without the motorcycle, includes passengers.                            |   |   |
|        | other rider  | People riding other types of vehicles like rickshaw, wheeled chair, scooter, mobility-scooter.     |  |  |
| animal | bird         | Includes birds on the ground.                                                                      |  |  |

ground animal      Animals which move on the ground.

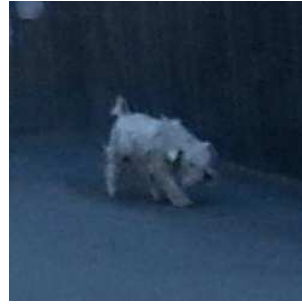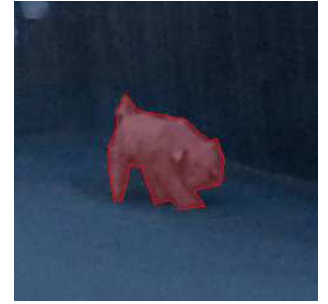

nature      mountain      Distant elevations of the ground.

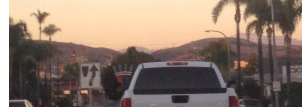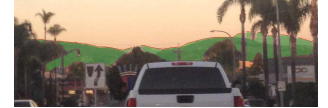

sand      Includes surfaces consisting of sand or sand heaps, e.g. at construction areas.

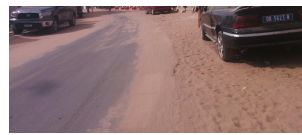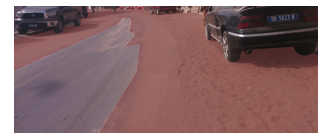

sky      Sky including fog or heavy precipitation.

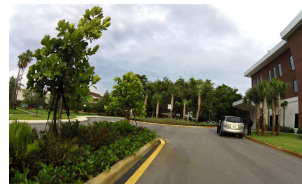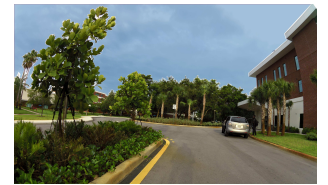

snow      Snow covered surfaces.

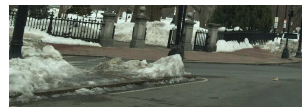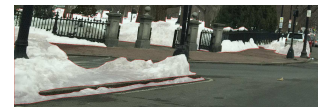

terrain      Grass and all other types of horizontal spreading vegetation, includes soil.

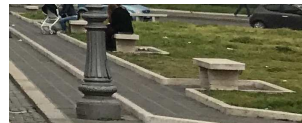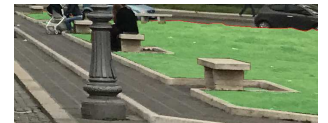

vegetation      Trees and other forms of vertical growing vegetation.

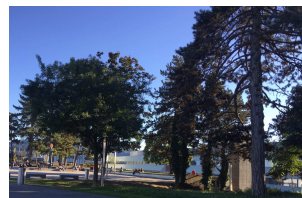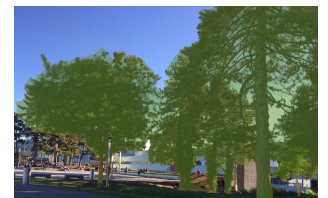

water      Ground surfaces covered by water.

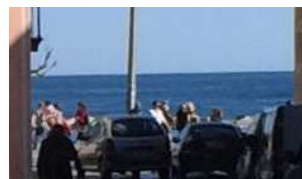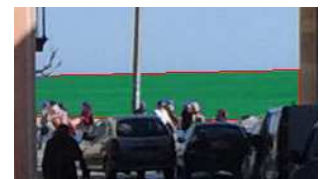

|      |             |                                                                                                                                    |                                                                                    |                                                                                     |
|------|-------------|------------------------------------------------------------------------------------------------------------------------------------|------------------------------------------------------------------------------------|-------------------------------------------------------------------------------------|
| void | car mount   | Mount used to hold the camera while capturing.                                                                                     |  |  |
|      | ego vehicle | Ego-vehicle, e.g. car hood, dashboard, driving mirror.                                                                             |  |  |
|      | unlabeled   | Regions of images without an assigned category. Categories which are not included in the research version are mapped to unlabeled. |  |  |

## Detailed results on semantic segmentation and instance-specific semantic segmentation

In Tab. 1 we report the per-category AP and AP@0.5 scores obtained for the Mapillary Vistas Dataset’s instance-specific semantic segmentation task on both, validation set and test set for the Mask R-CNN variant of the UCenter team that won the LSUN challenge. In the table we distinguish results obtained with a single model and an ensemble of models (see the main paper for details about their method).

In Tab. 2 we provide per-category IoU scores obtained for the Mapillary Vistas Dataset’s semantic segmentation task on both, the validation set and test set for PSPNet and Wider Resnet based approaches described in the main paper. We denote PSPNet + Cityscapes pre-training as  $PSPNet^+$ ,  $PSPNet^+$  + multi-scale testing as  $PSPNet^{++}$ , and  $PSPNet^{++}$  with 4 model ensembles as  $PSPNet^{+++}$ . Similarly, we denote the basic Wider Resnet with uniform sampling and cross-entropy loss as  $WiderNet$ , WiderNet + loss max-pooling and uniform sampling as  $WiderNet^+$ , and WiderNet + loss max-pooling and balanced class sampling as  $WiderNet^{++}$ .

## Class-Labels Taxonomy

In Fig. 1 we provide the taxonomy for all class labels. On the left, we provide the taxonomy for the root-level category *object*, where we omitted macro-level category *object* for presentation clarity (*i.e.*, we connected its children to the root-level category directly such as *e.g. Bench*). On the right, we see the taxonomies for the rest of the labels.

|                          | validation set       |        |                  |        | test set         |        |
|--------------------------|----------------------|--------|------------------|--------|------------------|--------|
|                          | UCenter single model |        | UCenter ensemble |        | UCenter ensemble |        |
|                          | AP                   | AP@0.5 | AP               | AP@0.5 | AP               | AP@0.5 |
| Bird                     | 7.10                 | 17.50  | 10.00            | 25.80  | 10.00            | 26.40  |
| Ground Animal            | 13.80                | 27.10  | 20.30            | 43.10  | 21.00            | 40.40  |
| Crosswalk - Plain        | 16.10                | 30.90  | 11.30            | 26.30  | 12.80            | 28.30  |
| Person                   | 38.50                | 70.90  | 35.90            | 68.80  | 37.00            | 69.50  |
| Bicyclist                | 27.70                | 63.60  | 23.00            | 53.20  | 23.60            | 54.60  |
| Motorcyclist             | 20.70                | 52.30  | 16.90            | 49.70  | 19.30            | 53.10  |
| Other Rider              | 2.70                 | 8.50   | 0.60             | 3.20   | 0.70             | 2.50   |
| Lane Marking - Crosswalk | 31.00                | 58.70  | 26.20            | 52.40  | 27.30            | 53.80  |
| Banner                   | 21.60                | 32.60  | 20.70            | 32.80  | 21.10            | 33.90  |
| Bench                    | 12.10                | 25.80  | 11.10            | 26.10  | 11.60            | 28.10  |
| Bike Rack                | 2.80                 | 8.40   | 1.80             | 4.80   | 3.30             | 8.40   |
| Billboard                | 28.50                | 45.70  | 27.10            | 44.90  | 27.60            | 45.20  |
| Catch Basin              | 21.30                | 40.20  | 21.70            | 43.00  | 22.70            | 43.70  |
| CCTV Camera              | 15.00                | 35.40  | 10.10            | 26.40  | 10.50            | 28.10  |
| Fire Hydrant             | 49.00                | 78.10  | 47.70            | 78.20  | 48.30            | 78.20  |
| Junction Box             | 34.90                | 53.00  | 27.90            | 43.20  | 28.40            | 43.40  |
| Mailbox                  | 11.30                | 20.50  | 18.00            | 32.10  | 18.40            | 32.60  |
| Manhole                  | 37.70                | 58.70  | 36.40            | 58.90  | 37.00            | 59.60  |
| Phone Booth              | 5.70                 | 12.90  | 7.80             | 14.30  | 8.50             | 14.50  |
| Street Light             | 45.10                | 78.60  | 37.10            | 71.90  | 37.60            | 72.20  |
| Pole                     | 18.60                | 50.20  | 15.40            | 44.50  | 16.10            | 45.50  |
| Traffic Sign Frame       | 7.90                 | 27.40  | 4.60             | 16.80  | 5.60             | 22.10  |
| Utility Pole             | 17.10                | 51.30  | 15.50            | 48.30  | 16.50            | 50.00  |
| Traffic Light            | 52.00                | 83.60  | 45.00            | 77.90  | 45.80            | 78.20  |
| Traffic Sign (Back)      | 31.30                | 57.30  | 24.00            | 50.50  | 25.10            | 51.00  |
| Traffic Sign (Front)     | 58.50                | 79.40  | 50.80            | 74.10  | 51.20            | 74.20  |
| Trash Can                | 36.60                | 56.40  | 35.60            | 56.40  | 36.20            | 56.90  |
| Bicycle                  | 22.90                | 54.00  | 19.60            | 48.20  | 20.40            | 49.20  |
| Boat                     | 1.00                 | 2.90   | 2.90             | 7.50   | 3.20             | 9.10   |
| Bus                      | 51.90                | 66.90  | 46.60            | 62.90  | 47.40            | 63.00  |
| Car                      | 63.50                | 85.50  | 58.90            | 82.40  | 59.70            | 82.70  |
| Caravan                  | 2.40                 | 3.40   | 6.60             | 9.50   | 7.50             | 9.50   |
| Motorcycle               | 30.20                | 64.30  | 24.80            | 56.80  | 26.70            | 59.00  |
| Other Vehicle            | 16.70                | 29.60  | 11.20            | 24.20  | 12.10            | 25.80  |
| Trailer                  | 11.90                | 20.00  | 16.80            | 24.70  | 18.00            | 24.50  |
| Truck                    | 44.50                | 61.40  | 42.00            | 58.40  | 42.90            | 59.00  |
| Wheeled Slow             | 9.60                 | 23.50  | 12.90            | 30.20  | 15.20            | 33.40  |
| Avg                      | 24.80                | 44.20  | 22.80            | 42.50  | 23.70            | 43.50  |

Table 1. Detailed results on the instance-specific semantic segmentation task of Mapillary Vistas Dataset in [%].

|                          | validation set      |                      |                       |          |                       |                        | test set              |          |                       |                        |
|--------------------------|---------------------|----------------------|-----------------------|----------|-----------------------|------------------------|-----------------------|----------|-----------------------|------------------------|
|                          | PSPNet <sup>+</sup> | PSPNet <sup>++</sup> | PSPNet <sup>+++</sup> | WiderNet | WiderNet <sup>+</sup> | WiderNet <sup>++</sup> | PSPNet <sup>+++</sup> | WiderNet | WiderNet <sup>+</sup> | WiderNet <sup>++</sup> |
| Bird                     | 15.80               | 17.11                | 9.04                  | 0.00     | 0.00                  | 14.45                  | 1.48                  | 0.00     | 0.00                  | 6.98                   |
| Ground Animal            | 24.52               | 33.80                | 45.61                 | 0.00     | 0.00                  | 41.15                  | 16.52                 | 0.00     | 0.00                  | 32.42                  |
| Curb                     | 61.51               | 63.82                | 64.90                 | 57.67    | 58.98                 | 58.42                  | 66.60                 | 58.31    | 60.08                 | 58.56                  |
| Fence                    | 63.99               | 65.85                | 66.97                 | 59.22    | 60.53                 | 59.33                  | 66.86                 | 55.94    | 57.12                 | 56.55                  |
| Guard Rail               | 63.33               | 65.20                | 67.01                 | 62.91    | 62.83                 | 63.87                  | 67.25                 | 63.39    | 62.96                 | 62.70                  |
| Barrier                  | 57.82               | 59.36                | 61.16                 | 52.17    | 54.34                 | 52.38                  | 67.21                 | 57.80    | 59.41                 | 58.49                  |
| Wall                     | 51.73               | 53.32                | 53.28                 | 44.88    | 47.91                 | 45.43                  | 53.30                 | 41.27    | 42.28                 | 41.98                  |
| Bike Lane                | 38.17               | 39.21                | 41.05                 | 21.18    | 21.96                 | 24.51                  | 27.24                 | 17.00    | 16.40                 | 18.70                  |
| Crosswalk - Plain        | 36.51               | 42.33                | 36.17                 | 9.86     | 12.72                 | 16.87                  | 39.25                 | 13.74    | 15.33                 | 16.60                  |
| Curb Cut                 | 21.65               | 23.10                | 25.24                 | 8.70     | 13.58                 | 14.09                  | 24.83                 | 8.30     | 12.90                 | 14.44                  |
| Parking                  | 25.69               | 27.00                | 28.35                 | 6.51     | 10.22                 | 12.14                  | 21.58                 | 8.47     | 10.30                 | 9.66                   |
| Pedestrian Area          | 40.88               | 38.40                | 43.97                 | 16.27    | 16.80                 | 21.55                  | 20.35                 | 12.28    | 11.29                 | 12.77                  |
| Rail Track               | 53.75               | 54.35                | 57.95                 | 44.06    | 39.95                 | 46.58                  | 68.00                 | 53.16    | 49.63                 | 50.98                  |
| Road                     | 87.90               | 88.71                | 89.29                 | 84.15    | 84.17                 | 84.43                  | 80.27                 | 85.60    | 85.83                 | 85.13                  |
| Service Lane             | 45.67               | 46.53                | 45.85                 | 23.35    | 25.69                 | 37.31                  | 46.79                 | 27.47    | 27.56                 | 33.92                  |
| Sidewalk                 | 68.24               | 68.95                | 72.07                 | 58.60    | 58.59                 | 56.68                  | 72.40                 | 58.93    | 58.79                 | 56.00                  |
| Bridge                   | 75.77               | 77.30                | 78.60                 | 67.63    | 68.80                 | 67.72                  | 74.23                 | 61.30    | 62.59                 | 59.91                  |
| Building                 | 88.60               | 89.18                | 89.20                 | 86.81    | 87.52                 | 86.78                  | 88.32                 | 84.00    | 84.41                 | 83.79                  |
| Tunnel                   | 32.61               | 32.91                | 27.59                 | 14.51    | 20.68                 | 19.83                  | 45.86                 | 19.59    | 21.48                 | 18.60                  |
| Person                   | 77.75               | 79.68                | 80.11                 | 74.90    | 75.23                 | 77.76                  | 78.54                 | 73.69    | 74.58                 | 74.78                  |
| Bicyclist                | 64.07               | 66.06                | 66.39                 | 45.38    | 42.42                 | 52.38                  | 54.60                 | 48.88    | 49.23                 | 45.96                  |
| Motorcyclist             | 67.19               | 69.59                | 69.48                 | 50.88    | 51.25                 | 64.89                  | 69.38                 | 52.17    | 54.73                 | 64.40                  |
| Other Rider              | 1.32                | 1.34                 | 1.35                  | 0.00     | 0.00                  | 1.77                   | 2.73                  | 0.00     | 0.00                  | 4.58                   |
| Lane Marking - Crosswalk | 68.79               | 70.84                | 72.29                 | 61.42    | 62.94                 | 61.75                  | 77.55                 | 65.39    | 66.51                 | 64.74                  |
| Lane Marking - General   | 58.44               | 60.79                | 61.42                 | 53.48    | 53.89                 | 53.13                  | 61.98                 | 53.74    | 54.25                 | 53.43                  |
| Mountain                 | 51.39               | 52.80                | 55.49                 | 42.19    | 47.98                 | 50.14                  | 61.70                 | 52.33    | 55.89                 | 54.84                  |
| Sand                     | 35.25               | 34.60                | 29.26                 | 0.50     | 8.46                  | 17.03                  | 30.13                 | 0.05     | 13.39                 | 15.50                  |
| Sky                      | 89.98               | 90.65                | 90.83                 | 98.05    | 98.11                 | 98.02                  | 80.74                 | 98.15    | 98.21                 | 98.09                  |
| Snow                     | 78.15               | 78.02                | 81.84                 | 76.26    | 77.90                 | 78.91                  | 78.57                 | 66.02    | 67.10                 | 65.29                  |
| Terrain                  | 71.48               | 72.67                | 73.43                 | 69.57    | 69.97                 | 69.22                  | 72.37                 | 66.56    | 66.94                 | 66.19                  |
| Vegetation               | 90.34               | 90.86                | 91.05                 | 90.00    | 90.19                 | 89.93                  | 81.23                 | 90.63    | 90.82                 | 90.50                  |
| Water                    | 78.85               | 80.64                | 81.57                 | 68.18    | 71.49                 | 70.15                  | 67.88                 | 57.40    | 59.21                 | 50.22                  |
| Banner                   | 34.80               | 37.23                | 37.22                 | 25.18    | 29.26                 | 29.66                  | 39.05                 | 23.33    | 26.88                 | 29.46                  |
| Bench                    | 41.38               | 44.90                | 47.44                 | 44.44    | 48.81                 | 49.93                  | 45.12                 | 30.03    | 34.94                 | 33.58                  |
| Bike Rack                | 21.14               | 23.47                | 22.60                 | 6.13     | 12.04                 | 12.09                  | 13.59                 | 4.30     | 8.10                  | 11.26                  |
| Billboard                | 51.51               | 53.85                | 54.49                 | 46.11    | 46.84                 | 46.70                  | 56.35                 | 47.82    | 47.92                 | 47.73                  |
| Catch Basin              | 44.84               | 47.97                | 47.59                 | 36.19    | 37.34                 | 41.56                  | 45.96                 | 29.96    | 33.25                 | 34.97                  |
| CCTV Camera              | 21.32               | 24.21                | 12.32                 | 0.00     | 0.00                  | 9.17                   | 12.26                 | 0.00     | 0.01                  | 7.51                   |
| Fire Hydrant             | 59.09               | 63.99                | 64.46                 | 15.16    | 36.53                 | 55.25                  | 56.88                 | 19.31    | 42.43                 | 54.53                  |
| Junction Box             | 44.94               | 50.33                | 57.96                 | 34.12    | 36.23                 | 41.21                  | 52.97                 | 37.82    | 41.04                 | 44.80                  |
| Mailbox                  | 13.95               | 17.77                | 14.80                 | 0.05     | 1.10                  | 19.03                  | 11.97                 | 0.00     | 0.89                  | 11.55                  |
| Manhole                  | 52.12               | 55.04                | 56.34                 | 46.56    | 47.33                 | 48.37                  | 49.62                 | 39.25    | 39.24                 | 42.64                  |
| Phone Booth              | 12.16               | 15.43                | 16.78                 | 0.08     | 10.43                 | 13.90                  | 9.78                  | 0.01     | 1.58                  | 5.57                   |
| Pothole                  | 12.94               | 13.35                | 9.09                  | 0.00     | 0.00                  | 5.62                   | 3.15                  | 0.00     | 0.00                  | 5.07                   |
| Street Light             | 46.82               | 49.99                | 48.53                 | 46.88    | 50.02                 | 49.26                  | 51.26                 | 49.09    | 52.16                 | 51.89                  |
| Pole                     | 50.46               | 54.16                | 54.01                 | 50.04    | 51.50                 | 50.92                  | 56.60                 | 51.55    | 53.43                 | 52.53                  |
| Traffic Sign Frame       | 56.69               | 57.71                | 57.23                 | 47.04    | 50.29                 | 52.26                  | 59.81                 | 46.90    | 50.20                 | 50.80                  |
| Utility Pole             | 52.76               | 55.64                | 55.98                 | 48.18    | 49.75                 | 49.10                  | 57.53                 | 47.62    | 50.17                 | 49.01                  |
| Traffic Light            | 69.63               | 72.47                | 73.02                 | 66.20    | 69.07                 | 69.00                  | 77.52                 | 71.87    | 74.52                 | 74.29                  |
| Traffic Sign (Back)      | 48.58               | 52.08                | 52.51                 | 39.97    | 44.97                 | 45.76                  | 54.15                 | 40.62    | 46.67                 | 47.83                  |
| Traffic Sign (Front)     | 75.27               | 76.78                | 76.70                 | 73.63    | 74.73                 | 74.39                  | 80.75                 | 76.60    | 78.14                 | 77.47                  |
| Trash Can                | 55.32               | 57.90                | 59.33                 | 49.06    | 51.25                 | 53.98                  | 61.78                 | 49.66    | 53.05                 | 54.74                  |
| Bicycle                  | 63.92               | 66.11                | 68.99                 | 63.17    | 64.53                 | 67.16                  | 65.33                 | 56.67    | 59.96                 | 60.93                  |
| Boat                     | 41.69               | 42.80                | 38.98                 | 12.28    | 24.04                 | 55.28                  | 20.04                 | 6.95     | 11.25                 | 13.64                  |
| Bus                      | 79.48               | 81.45                | 82.88                 | 67.06    | 68.48                 | 69.33                  | 82.78                 | 63.25    | 64.42                 | 60.66                  |
| Car                      | 92.18               | 93.05                | 93.08                 | 89.94    | 90.54                 | 90.72                  | 92.20                 | 89.20    | 89.82                 | 89.21                  |
| Caravan                  | 0.03                | 0.00                 | 0.00                  | 0.00     | 0.00                  | 2.94                   | 19.95                 | 0.00     | 0.00                  | 10.35                  |
| Motorcycle               | 66.16               | 68.14                | 70.36                 | 60.60    | 64.44                 | 66.23                  | 73.21                 | 62.74    | 64.48                 | 68.92                  |
| On Rails                 | 55.06               | 57.00                | 53.33                 | 20.00    | 24.91                 | 46.67                  | 51.32                 | 13.57    | 14.31                 | 16.94                  |
| Other Vehicle            | 28.37               | 30.65                | 33.81                 | 17.34    | 22.28                 | 27.18                  | 39.19                 | 18.57    | 23.00                 | 29.15                  |
| Trailer                  | 13.43               | 12.92                | 12.44                 | 0.00     | 0.00                  | 1.58                   | 15.96                 | 0.00     | 0.00                  | 7.33                   |
| Truck                    | 71.13               | 72.14                | 75.40                 | 61.52    | 65.21                 | 63.74                  | 72.73                 | 57.49    | 58.57                 | 56.89                  |
| Wheeled Slow             | 24.39               | 28.55                | 26.80                 | 1.69     | 21.56                 | 36.26                  | 35.37                 | 1.32     | 16.63                 | 29.35                  |
| Car Mount                | 71.95               | 72.96                | 74.78                 | 65.80    | 67.37                 | 60.10                  | 81.98                 | 73.16    | 75.47                 | 67.06                  |
| Ego Vehicle              | 92.93               | 93.19                | 93.32                 | 89.16    | 89.80                 | 88.82                  | 95.05                 | 91.38    | 92.17                 | 90.32                  |
| mean IoU                 | 51.59               | 53.51                | 53.85                 | 41.12    | 43.78                 | 47.72                  | 52.41                 | 40.79    | 42.98                 | 44.84                  |

Table 2. Detailed results on the semantic segmentation task of Mapillary Vistas Dataset in [%].

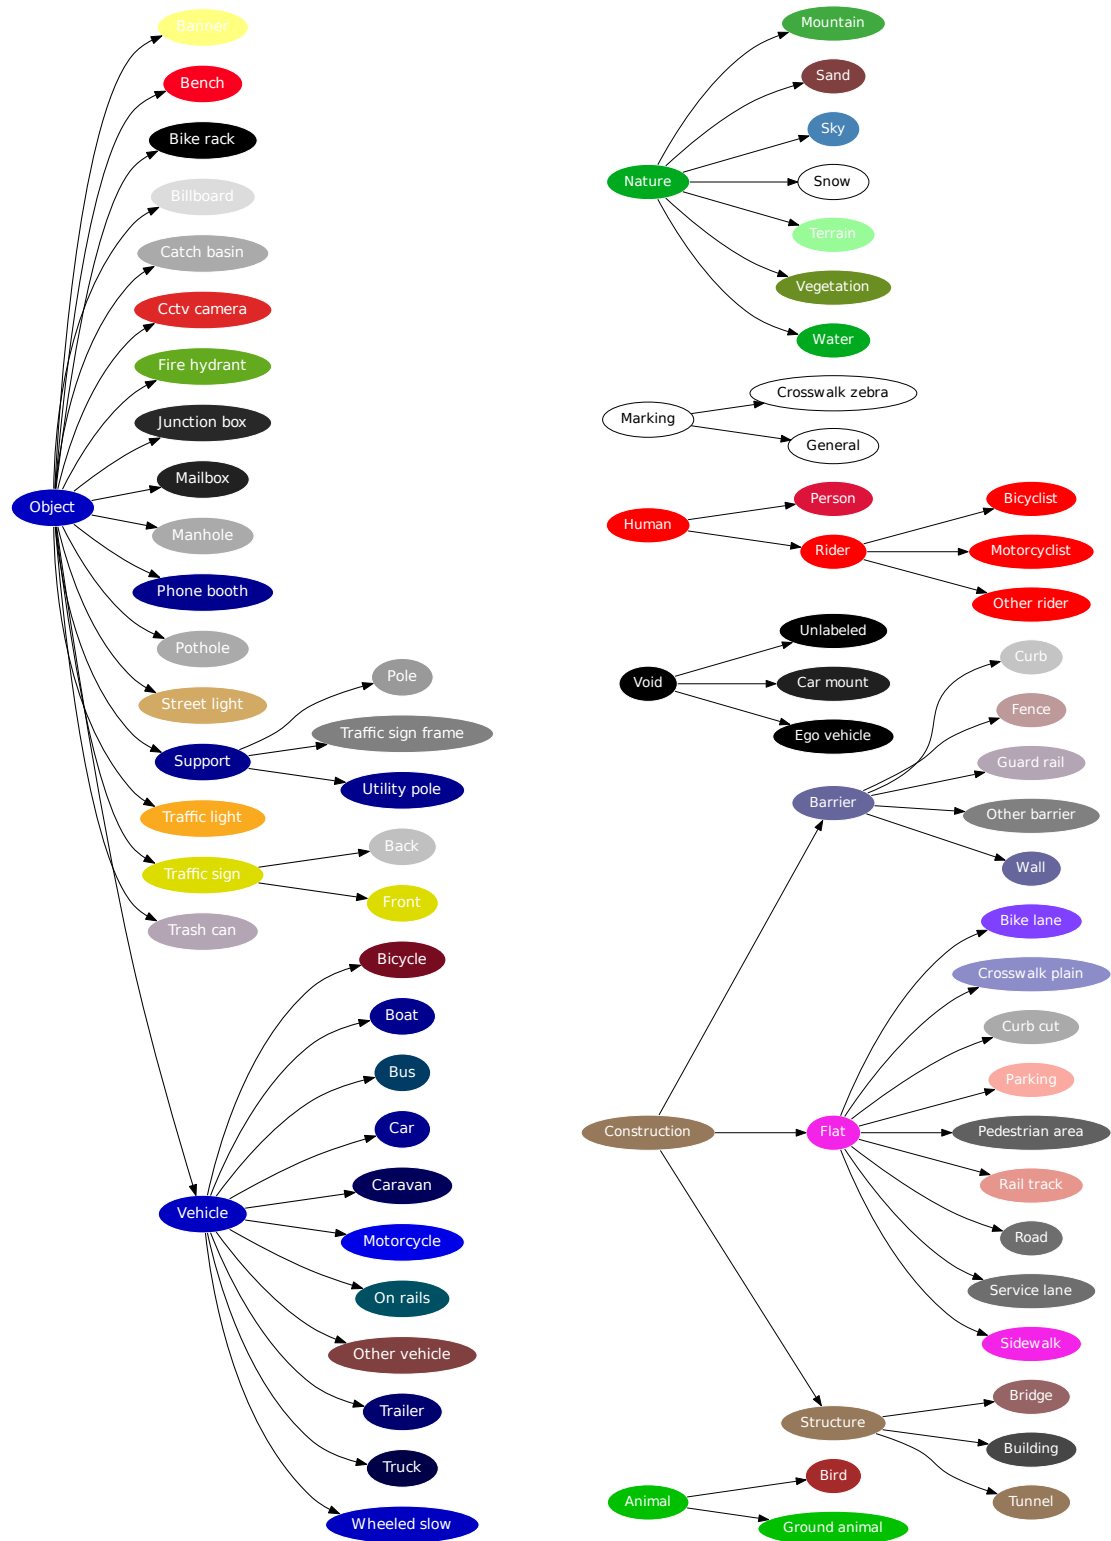

Figure 1. Taxonomy of class labels
